# Supplementary material for: On mineral dust aerosol hygroscopicity
Source: Copernicus journal article supplement (doi:10.5194/acp-2020-442), 2020-05-25
Supplement: Supplementary file [file acp-2020-442-AC1-supplement.pdf]

Comments from the editorial office and referees are in blue.

Our replies are in black.

Changes to the manuscript are highlighted in red both here and in the revised manuscript.

### Reply to referee #1

Recommendation:

The manuscript reports the hygroscopic properties of 7 authentic mineral dust samples and 14 major minerals contained in mineral dust. The manuscript aims to compare the results from this study to previous measurements on the same materials using a number of direct and indirect techniques.

**Reply:** We would like to thank ref #1 for reviewing our manuscript, and his/her comments, which helped us largely improve our manuscript, have been carefully addressed in our revision, as detailed below.

Abstract line 28: replace ‘very sensitive balance’ with actual name of instrument ‘vapor sorption analyzer’.

**Reply:** As suggested, in the revised manuscript (page 2), we have changed “using a very sensitive balance” to “using a vapor sorption analyzer”.

Abstract line 32: surface coverage of water has units. The numbers in this line do not have units. They refer to another quantity that should be labeled properly.

**Reply:** To be more accurate, “surface coverage” used in our manuscript should be “fractional surface coverage” instead. In the revised manuscript (page 2) we have changed “The surface coverages of adsorbed water” to “The fractional surface coverages of adsorbed water...”

Table 1: reports average particle diameter, yet no uncertainty values are listed and the number of significant figures is just not realistic. Revise for accuracy.

**Reply:** As suggested, in the revised manuscript (page 6) we have added uncertainty values for average particle diameters in Table 1.

Figure 2 is shown in the experimental section when it better moved to the results section

**Reply:** Indeed Figure 2 can be placed in the results section. However, Figure 2 is to show the experimental procedures, and thus we would like to keep Figure 2 in the experimental section.

Equation 1, line 189: represents the “fractional” surface coverage, hence, it is unitless. This definition should be emphasized throughout the manuscript. The unit for ‘surface area each adsorbed water molecule’ is wrong, and the value assumed is too small. There have been measurements of this number for metal oxides that should be used and get cited.

**Reply:** We agree that we should use “fractional surface coverage”. In the revised manuscript (page 10) we have changed “...surface coverage...” to “...fractional surface coverage (abbreviated as surface coverage)...”

The unit for “surface area each adsorbed water molecule” should be “cm<sup>2</sup>” instead of “cm<sup>-2</sup>”, and we have corrected in the revised manuscript (page 10). However, the value we used is correct, and in the revised manuscript (page 10) we have included a few references for this value.

Table 2-5: the formatting of the numbers is better in scientific than normal.

**Reply:** As suggested, we have change the format of these numbers in Tables 2-5, in order to increase their readability.

The discussion section 3.2.7 that compares the results to previous work is qualitative in nature. Given the limited novelty of this manuscript, the comparison has to be quantitative based on careful statistical analysis.

**Reply:** We have already compared our results with those reported in previous studies quantitatively in Sections 3.2.1-3.2.6; therefore, in Section 3.2.7 we only summarize the comparison between our and previous work in a qualitative manner in order to get some general conclusion.

It is stated in the manuscript that the experiments were repeated three times (page 9, line 169), yet none of the graphs have error bars on the data points?! This has to be fixed.

**Reply:** That is a very good point, and as suggested, in the revised manuscript we have included error bars for these figures. It should be noted that some error bars are not clearly visible because the uncertainties are very small.

Section 3.3 also talks about ‘goodness of fit’ in qualitative manner. This has to be fixed and the ‘goodness of fit’ argument has to be based on quantitative analysis.

**Reply:** In response to this comment, we have included R<sup>2</sup> values in the revised manuscript (page 28): “...can well fit  $\theta$  versus RH for all the 21 mineral dust samples examined (R<sup>2</sup> were found to be in the range of 0.94-0.99), and the generated...”

One important and crucial reason for the differences observed among different studies is the sample pre-treatment prior to water uptake studies. Gas phase water uptake on mineral dust and metal oxides is a surface process and hence the chemical composition of the surface plays an important role in the extent of water surface coverage. Therefore, a detailed discussion on this factor has be added to the manuscript.

**Reply:** Indeed pretreatment of mineral dust samples may have large effects on their hygroscopic properties. Nevertheless, pretreatment procedures used could differ significantly,

and it is difficult to assess their impacts of hygroscopic properties in different studies. We have added one sentence in the revised manuscript (page 27) to discuss the effect of pretreatment: “For the same dust (at least with the same name), different samples with distinctive hygroscopicity may have been used in our work and previous studies, contributing to the observed discrepancies. In addition, previous work may adopt various pretreatment procedures, and it is difficult to assess the effects of these pretreatment on dust hygroscopicity reported in different studies.”

This is also why in the original manuscript (page 27, line 423-429) we have suggested an inter-comparison study in which same samples would be used. In the revised manuscript (page 27) we have expanded it to highlight the pretreatment issue: “To further understand and resolve the discrepancies identified, it will be very useful to distribute the same samples to different groups (in which different techniques would be applied to study their hygroscopic properties) and compare the results obtained; furthermore, these samples should be pretreated with same or very similar protocols after received by different groups.”

The manuscript requires careful reading for grammar, punctuation, and sentence structure.

**Reply:** We have carefully read the manuscript again to minimize these errors.
